EDITORIAL

## *PLOS Pathogens* 2014 Reviewer Thank You

The Public Library of Science (PLOS) and the *PLOS Pathogens* editorial team would like to express our tremendous gratitude to all those individuals who participated in the peer review process this past year at *PLOS Pathogens*. As a journal that is run by and for the scientific community, we depend upon you, the community, to communicate our best work. 2014 was great year for *PLOS Pathogens*; during the year, 2,900 reviewers from around the world helped evaluate over 1,200 articles.

The names of our 2014 reviewers are listed in [S1 Reviewer List](#). Thank you to all our reviewers for sharing your expertise with the *PLOS Pathogens* authors. Your efforts are an important part of making the journal a highly read, highly cited, highly regarded open access resource created by and for the benefit of the scientific community.

### Supporting Information

**S1 Reviewer List. Alphabetical list of 2014 *PLOS Pathogens* reviewers.**  
(PDF)

### References

1. (2015) *PLOS Biology* 2014 Reviewer Thank You. PLoS Biol 13(2): e1002101. doi:[10.1371/journal.pbio.1002101](https://doi.org/10.1371/journal.pbio.1002101)
2. (2015) *PLOS Computational Biology* 2014 Reviewer Thank You. PLoS Comput Biol 11(2): e1004184. doi:[10.1371/journal.pcbi.1004184](https://doi.org/10.1371/journal.pcbi.1004184)
3. (2015) *PLOS Genetics* 2014 Reviewer Thank You. PLoS Gen 11(2): e1005070. doi:[10.1371/journal.pgen.1005070](https://doi.org/10.1371/journal.pgen.1005070)
4. (2015) *PLOS Medicine* 2014 Reviewer Thank You. PLoS Med 12(2): e1001806. doi:[10.1371/journal.pmed.1001806](https://doi.org/10.1371/journal.pmed.1001806)
5. (2015) *PLOS Neglected Tropical Diseases* 2014 Reviewer Thank You. PLoS Negl Trop Dis 9(2): e0003621. doi:[10.1371/journal.pntd.0003621](https://doi.org/10.1371/journal.pntd.0003621)
6. (2015) *PLOS ONE* 2014 Reviewer Thank You. PLoS ONE 10(2): e0121093. doi:[10.1371/journal.pone.0121093](https://doi.org/10.1371/journal.pone.0121093)

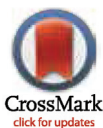

### OPEN ACCESS

**Citation:** (2015) *PLOS Pathogens* 2014 Reviewer Thank You. PLoS Pathog 11(2): e1004748. doi:[10.1371/journal.ppat.1004748](https://doi.org/10.1371/journal.ppat.1004748)

**Published:** February 27, 2015

**Copyright:** © 2015 This is an open access article distributed under the terms of the [Creative Commons Attribution License](#), which permits unrestricted use, distribution, and reproduction in any medium, provided the original author and source are credited.

**Funding:** The author(s) received no specific funding for this work.

**Competing Interests:** The authors have declared that no competing interests exist.
