*PLOS Pathogens* would like to thank all those who reviewed on behalf of the journal in 2014:

|                        |                          |
|------------------------|--------------------------|
| Pierre Abad            | John Altman              |
| Derek Abbott           | Daniel Altmann           |
| Kristina Abel          | Neal Alto                |
| Ernesto Abel-Santos    | Kishore Alugupalli       |
| Laurent Abi-Rached     | Jose Alves-Filho         |
| Soman Abraham-         | James Alwine             |
| Maria Abreu            | Sharif Aly               |
| Hans Ackerman          | Salomon Amar             |
| Margaret Ackerman      | Rama Amara               |
| Shelley Adamo          | Gaya Amarasinghe         |
| Erin Adams             | Khalid Amari             |
| Zach Adelman           | Richard Ambinder         |
| Joshua Adkins          | Zandrea Ambrose          |
| Heiko Adler            | Amal Amer                |
| Toni Aebischer         | Manuel Amieva            |
| Martin Aepfelbacher    | Rogiero Amino            |
| Mavis Agbandje-McKenna | Lynn Amon                |
| Vadim Agol             | Gregor Anderlueh         |
| Hector Aguilar         | Deborah Anderson         |
| Paul Ahlquist          | Gregory Anderson         |
| Rafi Ahmed             | David Andes              |
| Jin-Hyun Ahn           | Felipe Andrade           |
| Tero Ahola             | Norma Andrews            |
| Gillian Air            | Helene Andrews-Polymeris |
| Darrin Akins           | Alex Andrianopoulos      |
| Ramesh Akkina          | Elliot Androphy          |
| Randy Albrecht         | Matthew Angel            |
| Antonio Alcami         | Mary Ann McDowell        |
| John Alcorn            | Aftab Ansari             |
| Anna Aldovini          | Rustom Antia             |
| Courtney Aldrich       | Lis Antonelli            |
| Phillip Aldridge       | Janis Antonovics         |
| Grace Aldrovandi       | Takashi Aoki             |
| James Alexander        | Cristian Apetrei         |
| James Alfano           | Yiorgos Apidianakis      |
| Samuel Alizon          | Victor Appay             |
| Martin Allday          | James Aramini            |
| Lee-Ann Allen          | Miguel Aranda            |
| Igor Almeida           | Jacques Archambault      |
| Scott Alper            | José Argüello            |
| Luke Alphey            | Pablo Argüeso            |
| James Alspaugh         | Minetaro Arita           |
| Galit Alter            | Yasuo Ariumi             |
| Marcus Altfeld         | Raffi Aroian             |
| Christian Althaus      | David Aronoff            |

Gustavo Arrizabalaga  
James Arthos  
Ann Arvin  
Sassan Asgari  
David Askew  
David Asmuth  
Aravind Asokan  
Walter Atwood  
Victoria Auerbuch  
Yossef Av-Gay  
Paul Axelsen  
Janelle Ayres  
Abdu Azad  
Subash Babu  
Steven Bachenheimer  
Martin Bachmann  
Steffen Backert  
Vladimir Badovinac  
Marc Baguelin  
Justin Bahl  
Yong-Sun Bahn  
Joel Baines  
Anna Bakardjiev  
Andrew Baker  
David Baker  
Susan Baker  
Tim Baker  
Cosima Baldari  
Jonathan Ball  
Jimmy Ballard  
David Baltrus  
Charles Bangham  
James Bangs  
Ehud Banin  
Lawrence Banks  
James Bann  
Shweta Bansal  
Daniel L. Barber  
Alan Barbour  
A. Barclay  
Wendy Barclay  
Ralph Baric  
Carolina Barillas-Mury  
Eric Barklis  
Dale Barnard  
John Barnwell  
Dan Barouch  
Antonio Barragan  
François-Xavier Barre  
Ben Barres  
Alan Barrett

Alyssa Barry  
Clifton Barry  
Peter Barry  
Ralf Bartenschlager  
Nathan Bartlett  
Erik Barton  
Christopher Basler  
Paul Bates  
Thomas Baumert  
Andreas Baumler  
David Baumler  
Andreas Baur  
Sina Bavari  
Arnold Bayer  
Peter Beard  
Hans-Peter Beck  
Niko Beerenwinkel  
James Beeson  
Samuel Behar  
Marcel Behr  
Sven-Erik Behrens  
Eduardo Bejarano  
George Belov  
Alexia Belperron  
Robert Belshaw  
Eitan Ben-Dov  
Chris Benedict  
José Bengoechea  
Lbachir BenMohamed  
Richard Bennett  
Barbara Bensing  
Steven Bensing  
Leslie Berg  
Rance Berg  
Jeffrey Bergelson  
Molly Bergman  
Cornelia Bergmann  
Carl Bergstrom  
Andreas Bergthaler  
Vincent Beringue  
Ben Berkhout  
Gerald Berkowitz  
Judith Berman  
Phillip Berman  
Luiz Bermudez  
Jürgen Bernhagen  
Umberto Bertazzoni  
Richard Bessen  
Sonja Best  
Michael Betts  
Stephen Beverley

Sumita Bhaduri-McIntosh  
Gyan Bhanot  
Purnima Bhanot  
Nina Bhardwaj  
Tanmoy Bhattacharya  
David Bhella  
Vera Bianchi  
Martine Biard-Piechaczyk  
Paul Bieniasz  
Oliver Billker  
James Binley  
Andrew Binns  
Thomas Bjarnsholt  
Pamela Bjorkman  
Niklas Björkström  
Samuel Black  
Jenefer Blackwell  
Ira Blader  
Carol Blair  
David Blair  
Stéphane Blanc  
Stephane Blanc  
Steven Blanke  
Joel Blankson  
James Bliska  
Joseph Bliss  
Gary Blissard  
Ian Blomfield  
Bruno Blondel  
David Bloom  
Jesse Bloom  
Adriano Boasso  
Michael Boeckh  
David Boehr  
Teun Boekhout  
Debby Bogaert  
Matthew Bogyo  
David Bolam  
Blaise Boles  
Michael Bolker  
Melvin Bolton  
David Boltz  
Jennifer Bomberger  
Morgane Bomsel  
Ivo Boneca  
Marcelo Bonini  
Eliette Bonnefoy  
Marc Bonten  
André Boonstra  
John Boothroyd  
Mike Boots

Suresh Boppana  
Seth Bordenstein  
Kathleen Boris-Lawrie  
Katherine Borkovich  
Bradley Borlee  
Georg Bornkamm  
Eli Borrego  
Eric Bortz  
Irene Bosch  
Jurgen Bosch  
Santanu Bose  
Helena Boshoff  
Steven Bosinger  
Katharine Bossart  
Ken Bost  
Fadila Bouamr  
Michael Bouchard  
Martin Boulanger  
Steeve Boulant  
Aida Bouratbine  
Robert Bourret  
Chris Boutell  
Nicole Bouvier  
Klaas Bouwmeester  
Andrew Bowie  
Scott Boyd  
Jon Boyle  
Thomas Braciale  
Steven Bradfute  
Kenneth Bradley  
Peter Bradley  
Jonathan Bramson  
Curtis Brandt  
Philip Branton  
Jonathan Braun  
Alejandra Bravo  
Klaus Brehm  
Jason Brenchley  
Wade Bresnahan  
Stephane Bressanelli  
Luis Briebe  
John Briggs  
Volker Briken  
David Briles  
Paul Brindley  
Frederic Bringaud  
Melanie Brinkmann  
Margo Brinton  
Dustin Brisson  
Anne Britt  
William Britt

Robert Britton  
Warwick Britton  
Mark Brockman  
Peter Brodersen  
Priscille Brodin  
Igor Brodsky  
Barbara Broeker  
Heike Broetz-Oesterhelt  
Barbara Bröker  
Frank Brombacher  
David Brooks  
Laurent Brossay  
Alistair Brown  
Charles Brown  
Eric Brown  
Gordon Brown  
Judith Brown  
Edward Browne  
Petr Broz  
John Brumell  
Zabrina Brumme  
Wolfram Brune  
James Bryers  
Mark Brynildsen  
Peter Brzovic  
Juliane Bubeck-Wardenburg  
Susan Buchanan  
Michael Buchmeier  
Carmen Buchrieser  
Christopher Buck  
Frederick Buckner  
Pierre Buffet  
Marcus Buggert  
Alexander Bukreyev  
James Bull  
Peter Bull  
Andre Buret  
Stacey Burgess  
Jozsef Burgyan  
Barbara Burleigh  
James Burns  
Dennis Burton  
Benjamin Burwitz  
Frederic Bushman  
Jacinta Bustamante  
Sarah Butcher  
Geraldine Butler  
Noah Butler  
Gerald Byrne  
Andrew Byrnes  
Caughey Byron

Daniel C. Nelson  
Richard Calderone  
Richard Calendar  
Guy Caljon  
Niels Olsen Saraiva Câmara  
Christian Cambillau  
Caroline Cameron  
Jennifer Cameron  
Paul Cameron  
Andrew Camilli  
Gabriella Campadelli-Fiume  
Daniel Campbell  
Edward Campbell  
Kerry Campbell  
Thomas Campbell  
Kenneth Campellone  
Nathalie Campo  
David Canaday  
Bruno Canard  
Paula Cannon  
Edouard Cantin  
Michael Caparon  
Patrizia Caposio  
Rey Carabeo  
John Card  
Rhonda Cardin  
Cathleen Carlin  
Jonathan Carlson  
Fredric Carlsson  
James Carlyle  
Jason Carlyon  
Elisabeth Carniel  
Daniel Carr  
John Carr  
Mark Carrington  
Nicola Carter  
Jeffrey Cary  
John Casey  
James Cassat  
Bastien Castagner  
Araceli Castillo  
José Caston  
António Castro  
Maria Castro  
Robert Cattaneo  
Simon Cauchemez  
Francesc Cebrià  
Thomas Cecere  
Lynette Cegelski  
Jean Celli  
Stella Cesari

George Chaconas  
Kris Chadee  
Ann Chahroudi  
Donald Champagne  
Eric Chan  
John Chan  
Bala Chandran  
Kartik Chandran  
Jeff Chang  
Kyong-Mi Chang  
Theresa Chang  
Moses Chao  
Pratip Chattopadhyay  
sujata Chaudhari  
Linda Chelico  
Benjamin Chen  
Honglin Chen  
Mei-Ru Chen  
Sharon Chen  
Zhixiang Chen  
Hua Cheng  
Bobby Cherayil  
Peter Cherepanov  
Yury Chernoff  
Sara Cherry  
Bruce Chesebro  
Christophe Chevillard  
John Chiorini  
Chetan Chitnis  
Michael Cho  
Hyeryun Choe  
Il-Ryong Choi  
Nicolas Chomont  
claire Chougnet  
Gerardo Chowell  
Dinesh Christendat  
Neil Christensen  
David Christianson  
Peter Christie  
Hong Wei Chu  
June Kwon Chung  
Luka Cicin-Sain  
Andrea Cimarelli  
Vincenzo Ciminale  
Alexander Ciota  
Paul Clapham  
François Clavel  
Steven Clegg  
Jan Clement  
Axel Cloeckaert  
Joachim Clos

Christine Clouser  
Gitta Coaker  
Sarah Cobey  
Ian Cockburn  
Donald Coen  
Tom Coenye  
Jorn Coers  
Gary Cohen  
David Colby  
Jonathan Coles  
Jerome Collemare  
Andrew Collins  
James Collins III  
Marco Colonna  
Richard Compans  
Teresa Compton  
Wayne Conlan  
Sarah Connolly  
Mark Connors  
Nicholas Conrad  
Paul Converse  
Klaus Conzelmann  
Gregory Cook  
Brad Cookson  
Andrea Cooper  
Chester Cooper  
Christopher Cooper  
Isabelle Coppens  
Gordon Corey  
Lawrence Corey  
Brendan Cormack  
Stephania Cormier  
Cynthia Cornelissen  
Nicolas Corradi  
Laurent Coscoy  
Pascale Cossart  
Agnès Coste  
Susan Cotmore  
Peggy Cotter  
Fasseli Coulibaly  
Sarah Coulthurst  
Kevin Couper  
Antonello Covacci  
Leah Cowen  
Siobhan Cowley  
Andrea Cox  
Jeffery Cox  
Brendan Crabb  
Alister Craig  
Lisa Craig  
Robert Cramer

Alison Crawford  
Alison Criss  
Ileana Cristea  
Paul Crocker  
Peter Crompton  
James Cronin  
James Crowe  
Angela Cruz  
Laszlo Csonka  
Jie Cui  
Bryan Cullen  
Paul Cullen  
James Culver  
Anthony Cunningham  
Colm Cunningham  
James Cunningham  
Aubrey Cunnington  
Christina Cuomo  
Stephen Curry  
Roy Curtiss III  
Melanie Cushion  
Jason Cyster  
Clarissa da Costa  
Akram Da'dara  
Johanna Daily  
Lisa Daley-Bauer  
Tamas Dalmay  
Marc Dalod  
John Dalton  
Satya Dandekar  
Kenyon Daniel  
Robert Daniels  
Pranav Danthi  
Richard D'Aquila  
Richard Darveau  
Gobardhan Das  
Saumitra Das  
Sandip Datta  
Robert Daum  
John David  
L. David Sibley  
David Davido  
Stephen Davies  
Brigid Davis  
Mark Davis  
Christopher Dawson  
Thomas Dawson, Jr.  
Brad Day  
Cheryl Day  
Patrick De Baetselier  
Luiz Pedro de Carvalho

Raffele De Francesco  
Cornelis de Haan  
Sybren de Hoog  
Juan C. de la Torre  
Marianne De Paepe  
Jaap de Roode  
Aravinda de Silva  
Petra de Verdier  
Emmie de Wit  
Marcel de Zoete  
Ralph Dean  
Zeger Debyser  
Steven Deeks  
George Deepe, Jr.  
Victor DeFilippis  
Raffaele DeFrancesco  
Mariapia Degli-Esposti  
Christoph Dehio  
Kirk Deitsch  
Hernando del Portillo  
Henri-Jacques Delecluse  
Neal Deluca  
Eric Delwart  
Christophe d'Enfert  
Hongyu Deng  
Mark Denison  
Eric Denkers  
Joe Dent  
Dee Denver  
Lisa Denzin  
Rajendar Deora  
Cynthia Derdeyn  
Vojo Deretic  
Isabelle Derré  
Jeremy Derrick  
Petra Dersch  
Prashant Desai  
Albert Descoteaux  
David Deshazer  
Alain Dessen  
Andrea Dessen  
Darrell Desveaux  
Corrella Detweiler  
Murray Deutscher  
Rebekah DeVinney  
Eric Déziel  
Antonio Di Pietro  
Francesco Di Serio  
Gill Diamond  
Arturo Diaz  
Felipe Diaz-Griffero

Marcel Dicke  
Martin Dickman  
Andrew Diener  
Binh Diep  
Lars Dietrich  
Stephanie Diezmann  
Paul Digard  
Joseph Dillard  
Daniel DiMaio  
Dimitar Dimitrov  
Nigel Dimmock  
George Dimopoulos  
Charles Dinarello  
Jianbing Ding  
Rhoel Dinglasan  
Francisco Dionisio  
Dirk Dittmer  
Ulf Dittmer  
Maziar Divangahi  
Narendra Dixit  
Julianne Djordjevic  
Andrzej Dlugosz  
Thomas Dobner  
Karen Dobos  
Roberto Docampo  
David Dockrell  
Peter Dodds  
Mike Doenhoff  
Christian Doerig  
T. Mark Doherty  
Valerian Dolja  
Lars Dölken  
Robert Doms  
Arjen Dondorp  
Xinnian Dong  
Ruben Donis  
Denise Doolan  
John Doorbar  
Katie Doores  
Kelly Doran  
Philip Dormitzer  
George DosReis  
Angela Douglas  
Simon Dove  
Shaynoor Dramsi  
Simon Draper  
Michael Drebot  
Christian Drosten  
Peter Dube  
David Dubnau  
Jean Dubuisson

Jaquelin Dudley  
Penelope Duerksen-Hughes  
Siobain Duffy  
Alain Dufour  
Guillaume Dumenil  
Eric Dumonteil  
Joseph Duncan  
Paul Dunman  
Gary Dunny  
Sarah Dunstan  
Olivier Duron  
Michael Dustin  
Rebecca Dutch  
Daniel Ebbola  
Gregory Ebel  
Hideki Ebihara  
Joshua Eby  
W. Edward Swords  
Jennifer Edwards  
Stacey Efstathiou  
Laurence Eisenlohr  
Amie Eisfeld  
Nels Elde  
John Elder  
Ioannis Eleftherianos  
Santiago Elena  
Ayman El-Guindy  
Richard Elliott  
Jeff Ellis  
Jerrold Ellner  
Michael Emerman  
Stephane Emiliani  
Alan Engelman  
David Engman  
Christian Engwerda  
Luis Enjuanes  
Jost Enninga  
Lynn Enquist  
Alexander Ensminger  
Armin Ensser  
Mark Eppinger  
Joel Ernst  
Robert Ernst  
Peter Espenshade  
Eduardo Espeso  
Jerome Estaquier  
José Esté  
Mariano Esteban  
Jacob Estes  
David Evans  
Jay Evans

Matthew Evans  
David Everly  
Mario Fabri  
Anna-Bella Failloux  
Erik Falck-Pedersen  
Franco Falcone  
Bryce Falk  
Padraic Fallon  
Ferric Fang  
Donna Farber  
Stephen Farrand  
Helen Farrell  
Michael Farzan  
Bruno Favery  
Michael Federle  
Mario Feldman  
Heinz Feldmann  
Carl Feng  
Ningguo Feng  
Pinghui Feng  
Ana Fernandez-Sesma  
Guido Ferrari  
Martin Ferris  
Tobias Feuchtinger  
Paul Fey  
Richard Ffrench-Constant  
Mark Field  
Joshua Fierer  
Luisa Figueiredo  
Sergio Filipe  
Scott Filler  
Alain Filloux  
Claire Marie Filone  
Keisha Findley  
Stefan Finke  
Matthew (Mat) Fisher  
Katherine Fitzgerald  
Louis Flamand  
Bernhard Fleckenstein  
James Fleckenstein  
Suzanne Fleiszig  
Erik Flemington  
Michelle Flenniken  
S. Flint  
Alexander Flügel  
Ervin Fodor  
Ismael Fofana  
Antonella Folgori  
J. Forrest  
Naomi Forrester  
Elizabeth Fortunato

Sarah Fortune  
Simon Foster  
Ron Fouchier  
Keith Fowke  
Vance Fowler  
Cornel Fraefel  
Nicole Frahm  
Nathalie Franc  
Olivera Francetic  
Dara Frank  
Gad Frankel  
Michael Franklin  
James Fraser  
John Fraser  
Martin Fraunholz  
Eric Freed  
Nancy Freitag  
Daved Fremont  
Martyn French  
Ute Frevert  
Harvey Friedman  
Matthew Frieman  
Paul Friesen  
Timothy Friesen  
Teresa Frisan  
Friedrich Frischknecht  
Rémi Fronzes  
Horacio Frydman  
Tobias Fuchs  
Robert Fujinami  
Takashi Fujita  
Dahlene Fusco  
Ruth Gabizon  
Michaela Gack  
Jennifer Gaddy  
Pascal Gagneux  
Michael Gale, Jr.  
Thomas Gallagher  
Teresa Gallart  
Giorgio Gallinella  
Richard Gallo  
Jean-Luc Gallois  
Denise Galloway  
Shou-Jiang Gao  
Zhiyong Gao  
Laurent Gapin  
David Garboczi  
Robert Garcea  
Felipe Garcia  
J. Victor Garcia  
Juan Antonio García

Mariano Garcia-Blanco  
Adolfo Garcia-Sastre  
Dominique Garcin  
Melanie Gareau  
Suzanne Garland  
Danielle Garsin  
Nicholas Gascoigne  
Walter Gassmann  
Pablo Gastaminza  
William Gause  
Gregory Gauthier  
Timothy Geary  
Adam Geballe  
Suzanne Geerlings  
Teunis Geijtenbeek  
Thomas Geisbert  
Caroline Genco  
Howard Gendelman  
Elke Genersch  
George Georgiou  
Ronald Germain  
Paul Gershon  
Antoine Gessain  
Elodie Ghedin  
Frank Gherardini  
Godelieve Gheysen  
Partho Ghosh  
Mauro Giacca  
Chou-Zen Giam  
Luis Giavedoni  
David Giedroc  
Robert Gifford  
Tim Gilberger  
Jason Gill  
Sarjeet Gill  
Sarah Gilmore  
Michael Ginger  
Ole Gjoerup  
Britt Glaunsinger  
Michael Glickman  
Michael Glogauer  
Jerome Goddard  
Paul Goepfert  
Stephen Goff  
Marielle Gold  
Scott Gold  
Joanna Goldberg  
Marcia Goldberg  
William Goldman  
Pascal Goldschmidt-Clermont  
Tatyana Golovkina

David Gondek  
Fernando Gonzalez-Candelas  
Mercedes Gonzalez-Juarrero  
Felicia Goodrum  
Paul Gorry  
Susan Gottesman  
Geoffrey Gottlieb  
Heinrich Gottlinger  
Eva Gottwein  
Friedrich Götz  
David Grainger  
Arash Grakoui  
Lone Gram  
Thomas Gramberg  
Roger Grand  
Duane Grandgenett  
Neil Granger  
Sarah Grant  
Warwick Grant  
Clive Gray  
Urs Greber  
Jeffrey Green  
Patrick Green  
Sharone Green  
William Green  
Doron Greenbaum  
Peter Gresshoff  
Christoph Grevelding  
Giorgio Gribaudo  
Anne Griep  
Diane Griffin  
Paul Griffiths  
Michael Grigg  
Sergio Grinstein  
Tamara Gritsun  
Eduardo Groisman  
Allison Groseth  
Jeff Grotzke  
Liber Grubhoffer  
Angelika Grundling  
Christoph Grundner  
Kay Grunewald  
Marc-Jan Gubbels  
Christophe Guilhot  
David Guiliano  
Karen Guillemin  
Nancy Guillen  
Keith Gull  
Suryaram Gummuluru  
John Gunn  
Arthur Gunzl

Haitao Guo  
Ju-Tao Guo  
Sunetra Gupta  
Ricardo Gürtler  
Esteban Gurzov  
Kurt Gustin  
Bart Haagmans  
David Haake  
Hubertus Haas  
Rainer Haas  
Ashley Haase  
Georg Häcker  
Ted Hackstadt  
Elias Haddad  
Julius Clemence Hafalla  
Ilka Haferkamp  
Young Hahn  
Matthais Hahn  
David Haig  
Nancy Haigwood  
Stephen Hajduk  
Rana Hajjeh  
Mohamed Hakimi  
Morgan Hakki  
Benjamin Hale  
William Halford  
Andrew Hall  
Jessica Hamerman  
Sven Hammerschmidt  
Wolfgang Hammerschmidt  
Jiahuai Han  
Lynn Hancock  
Dorit Hanein  
Diana Hansen  
Immo Hansen  
Alexandre Harari  
Kim Hardie  
Clifford Harding  
Wolf-Dietrich Hardt  
Richard Hardy  
Edward Harhaj  
David Harris  
Mark Harris  
Nicola Harris  
Reuben Harris  
Joe Harrison  
Paul Harrison  
Robert L. Harrison  
Stephen Harrison  
Axel Hartke  
Dominik Hartl

Elizabeth Hartland  
Susanne Hartmann  
Kevan Hartshorn  
John Harty  
Ronald Harty  
Eric Harvill  
Caroline Harwood  
Rie Hasebe  
Masanori Hatakeyama  
Alan Hauser  
Susanne Häussler  
Thomas Hawn  
Barton Haynes  
S. Hayward  
Bin He  
Chuan He  
Cynthia He  
Ping He  
Mark Head  
Kevin Healy  
Patrick Hearing  
William Heath  
Nicholas Heaton  
Jürgen Heesemann  
Johannes Hegemann  
Bernd Heimrich  
Manfred Heinlein  
David Heinrichs  
Franz Heinz  
Robert Heinzen  
Mark Heise  
Joseph Heitman  
Zdenek Hel  
Ekaterina Heldwein  
Ari Helenius  
John Helmann  
Helena Helmy  
Piers Hemsley  
Els Henckaerts  
Robert Hendricks  
Hartmut Hengel  
Philipp Henneke  
Thomas Henry  
Scott Hensley  
Joshua Herbeck  
Debroski Herbert  
Elisabeth Herniou  
Susanne Herold  
Anat Herskovits  
Laura Hertel  
Heiko Herwald

Dagmar Heuer  
Holger Heuer  
Tarek Hewezi  
James Hewitson  
Meryllyn Hibma  
Andres Hidalgo  
Hubert Hilbi  
William Hildebrand  
Rolf Hilgenfeld  
Ann Hill  
Darryl Hill  
Julian Hillyer  
Catarina Hioe  
Alec Hirsch  
Vanessa Hirsch  
Robert Hirt  
John Hiscott  
Amy Hise  
Andrew Hislop  
Florian Hladik  
James Hoch  
Richard Hodinka  
Johan Hofkens  
Daniel Hoft  
Cory Hogaboam  
Deborah Hogan  
Saskia Hogenhout  
Brenda Hogue  
Tobias Hohl  
Thomas Hohn  
Michael Holbrook  
David Holden  
Lindy Holden-Dye  
Anthony Holder  
Edward Hollox  
Edward Holmes  
Fred Homa  
Dirk Homann  
Derek Hood  
Magnus Hook  
Kelli Hoover  
Thomas Hope  
Lien-I Hor  
Masayuki Horie  
Yasuhiko Horiguchi  
David Horn  
Stacy Horner  
Mady Hornig  
William Horsnell  
Alexander Horswill  
Branka Horvat

Curt Horvath  
Anne Hosmalin  
Eileen Hotze  
Fanjian Hou  
Barbara Howlett  
Peter Howley  
Marc Hoylaerts  
Peter Hraber  
Michael Hsieh  
Bin Hu  
Ke Hu  
Wei-Shau Hu  
I-Chueh Huang  
Jinghe Huang  
Xi Huang  
Andree Hubber  
Bernhard Hube  
Alisa Huffaker  
Gary Huffnagle  
David Hughes  
Kelly Hughes  
Stephen Hughes  
Raymond Hui  
Edgar Huitema  
Christina Hull  
Scott Hultgren  
Chiung-Yu Hung  
Deborah Hung  
David Hunstad  
Peter Hunt  
Christopher Hunter  
Eric Hunter  
Martha Hunter  
Nora Hunter  
William Hunter  
Jason Huntley  
Laurence Hurley  
Greg Hurst  
Aeron Hurt  
Eric Huseby  
Lindsey Hutt-Fletcher  
Alexander Idnurm  
Tetsuro Ikegami  
Jean-Luc Imler  
Hanne Ingmer  
Naohiro Inohara  
Naoki Inoue  
David Irani  
Javier Irazoqui  
Keith Ireton  
Takashi Irie

James Ironside  
Stuart Isaacs  
Ralph Isberg  
Ken Ishii  
Masayuki Ishikawa  
Stanimir Ivanov  
Juraj Ivanyi  
Tina Iverson  
Yoshihiro Izumiya  
Andrew Jackson  
William Jackson  
Jeffrey Jacobson  
John Jaenike  
Chinnaswamy Jagannath  
Sanjay Jain  
Sirpa Jalkanen  
Leo James  
Timothy James  
Julie Jameson  
Marc Jamin  
Guilhem Janbon  
McKeating Jane  
Dragana Jankovic  
Barbara Jaraus  
Theodore Jardetzky  
Dan Jarosz  
Ronald Javier  
F. Javier Cabañes  
Max Jean Toledo  
Lars Jelsbak  
Urs Jenal  
Stephen Jenkins  
Howard Jenkinson  
Annette Jensen  
Mark Jepson  
Ann Jerse  
Samithamby Jeyaseelan  
Ravi Jhaveri  
Yinduo Ji  
Lubin Jiang  
Zhengfan Jiang  
Francis Jiggins  
Xia Jin  
Ludger Johannes  
Eric Johannsen  
Michael Johansson  
Chandy John  
Alexander Johnson  
David Johnson  
Karyn Johnson  
Marc Johnson

R Johnson  
R. Paul Johnson  
Welkin Johnson  
Brad Jones  
Clinton Jones  
Ian Jones  
Jeff Jones  
Malcolm Jones  
Michael Jones  
Stipan Jonjic  
Matthieu Joosten  
Catherine Jopling  
Christine Josenhans  
Sarah Joseph  
Jean-Philippe Julien  
Isabelle Jupin  
Dominika Jurkovic  
Pradeep Kachroo  
Aras Kadioglu  
Susan Kaech  
Jonathan Kagan  
Kevin Kain  
Robert Kalejta  
Isgouhi Kaloshian  
Nobuhiko Kamada  
Seogchan Kang  
Michael Kann  
Thirumala-Devi Kanneganti  
Michael Kanost  
Ray Kaplan  
Stefan Kappe  
William Karesh  
David Karlin  
Annika Karlsson  
Gunilla Karlsson Hedestam  
Jonathan Karn  
Timothy Karr  
Denuja Karunakaran  
Fatah Kashanchi  
Richard Kaslow  
Fumiaki Katagiri  
Christine Katlama  
Peter Katsikis  
Richard Katz  
Michael Katze  
Daniel Kaufmann  
Stefan Kaufmann  
Rupert Kaul  
Amitinder Kaur  
Deepak Kaushal  
Radhey Kaushik

Shun-ichiro Kawabata  
Ikuro Kawagishi  
Toshiaki Kawakami  
Thomas Kawula  
Michael Kay  
Kenneth Kaye  
Paul Kaye  
Joseph Keane  
Katherine Kedzierska  
Brandon Keele  
Scott Keely  
Marijke Keestra  
Thomas Kehl-Fie  
Alison Kell  
Paul Kellam  
Nancy Keller  
Michelle Kelliher  
John Kelly  
Brian Kelsall  
Christopher Kemball  
Eric Kemen  
Melissa Kendall  
Linda Kenney  
Stephen Kent  
Thomas Kepler  
Robin Ketteler  
Vineet KewalRamani  
Nemat Keyhani  
Imtiaz Khan  
Kamal Khanna  
Rajiv Khanna  
Hossein Khiabani  
Alexander Khromykh  
Elliott Kieff  
Margaret Kielian  
Marjolein Kikkert  
Byung Kim  
Carol Kim  
Charles Kim  
Dennis Kim  
Peter Kima  
Paul Kinchington  
Jason Kindrachuk  
Christine King  
Christopher\* King  
Irah King  
Kayla King  
Nicholas King  
Frank Kirchhoff  
Karla Kirkegaard  
Hirohito Kita

Scott Kitchen  
Todd Kitten  
Tohru Kiyono  
Per Johan Klasse  
Nichole Klatt  
Colin Kleanthous  
Bruce Klein  
Robyn Klein  
Aloysius Klingelhutz  
Kimberly Klonowski  
Rob Knell  
David Knipe  
Leigh Knodler  
Dennis Ko  
Joachim Koch  
Georg Kochs  
Uwe Koedel  
Theresa Koehler  
David Koelle  
Leo Koenderman  
Renate Koenig  
Alain Kohl  
Nikolay Kolev  
Jay Kolls  
Dennis Kolson  
Kouacou Konan  
Leopold Kong  
Michael Konkol  
James Konopka  
Michael Koomey  
Eugene Koonin  
Geert Kops  
Bette Korber  
Hardy Kornfeld  
Benoit Kornmann  
Nicole Koropatkin  
Konstantin Korotkov  
Anita Koshy  
Sergei Kotenko  
Andrew Kotze  
Richard Koup  
Konstantin Kousoulas  
Igor Kovalchuk  
Timothy Kowalik  
Yoshio Koyanagi  
Joanna Koziel  
Pamela Kozlowski  
Peter Kraiczky  
Florian Krammer  
Sven Krappmann  
Laurent Kremer

Thomas Krey  
Lakshmi Krishnan  
Bernhard Krismer  
Thomas Kristie  
Mitchell Kronenberg  
James Kronstad  
Pascale Kropf  
Anne Krug  
Laurie Krug  
Damian Krysan  
Urszula Krzych  
Paul Kubes  
Tomoko Kubori  
Karl Kuchler  
Meta Kuehn  
Ralf Kueppers  
Richard Kuhn  
Carol Kumamoto  
Pankaj Kumar  
Purnima Kumar  
Barbara Kunkel  
Jonathan Kurtis  
Christian Kurts  
Sergei Kusmartsev  
Olaf Kutsch  
Kazuhiro Kutsukake  
Mamuka Kvaratskhelia  
Douglas Kwon  
Peter Kwong  
Fabien Labroussaa  
Andrew Lackner  
Benoit Lacroix  
D. Borden Lacy  
Monique Lafon  
Bernard Lafont  
Michael Lagunoff  
Timothy Lahey  
Erh-Min Lai  
Michael M. C. Lai  
Lou Laimins  
Jean-François Laliberté  
Joseph Lam  
Tracey Lamb  
Kris Lambert  
Paul Lambert  
Louis Lambrechts  
David Lambright  
Ke Lan  
Christina Lancioni  
Nathaniel Landau  
Thomas Lane

Jeroen D Langereis  
Jan Langeveld  
Gordon Langsley  
Lewis Lanier  
Iñigo Lasa  
Corinne Lasmezas  
Jean-Paul Latgé  
Wyndham Lathem  
Georg Lauer  
Adam Lauring  
Grégoire Lauvau  
Catherine Lavazec  
Mara Lawniczak  
Brian Lazzaro  
Jacques Le Pendu  
Susan Lea  
Brian Leander  
Francois Lebreton  
Michael Lederman  
Benhur Lee  
Bok-Luel Lee  
Chia Lee  
Jean Lee  
Peter Lee  
Vincent Lee  
Yong-Hwan Lee  
Molly Leecaster  
Ann Leen  
Kevin Legge  
Nicolas Legrand  
Paul Lehner  
David Leib  
Salome Leibundgut-Landmann  
Andrew Leigh Brown  
Philippe Lemey  
Stanley Lemon  
Deborah Lenschow  
Laurel Lenz  
John Leong  
Philip Leopold  
Jean Lepault  
Didier Lereclus  
Ganjana Lertmemongkolchai  
Julien Lescar  
Justin Lessler  
Elena Levashina  
Stuart Levitz  
Virgilio Lew  
Shawn Lewenza  
Sharon Lewin  
David Lewinsohn

George Lewis  
Jianrong Li  
Mei-Ling Li  
Ming Li  
Xiao-Dong Li  
Xin Li  
Yi Li  
Chen Liang  
T. Jake Liang  
Mathias Lichterfeld  
Brian Lichty  
Paul M Lieberman  
Susan Liebman  
Thomas Liebrand  
Egil Lien  
Jan Liese  
Mark Liles  
Maria Limberis  
Na-Sheng Lin  
Rongtuan Lin  
Wenyu Lin  
Xiaorong Lin  
Xin Lin  
Zhen Lin  
Paul Ling  
Klaus Lingelbach  
Dirk Linke  
Michail Lionakis  
Volker Lipka  
Su Lishan  
Susan Little  
Fenyong Liu  
George Liu  
Haoping Liu  
Jie Liu  
Shan-Lu Liu  
Yancheng Liu  
Yule Liu  
Zheng-Gang Liu  
Manuel Llinás  
Kwok-Wai Lo  
Mario Lobigs  
Volker Lohmann  
James Lok  
P'ng Loke  
Steven Lommel  
Ben Longdon  
Yueh-Ming Loo  
Susana Lopez  
Carolina López  
Miguel López-Botet

Juan Jose Lopez-Moya  
Jose Lopez-Ribot  
Graciela Lorca  
Michael Lorenz  
Jennifer Loros  
Alex Loukas  
Sebastian Lourido  
Philip LoVerde  
Anice Lowen  
Pedro Lowenstein  
Laura Lowery  
Franklin Lowy  
Olga Lubman  
Stephen Luby  
Stephan Ludwig  
Micah Luftig  
David Lukac  
Aron Lukacher  
Nicholas Lukacs  
Julius Lukes  
Oana Lungu  
Guangxiang Luo  
Sara Lustigman  
Katherine Luzuriaga  
Samantha Lycett  
Joseph Lynch  
Jiyan Ma  
Wenbo Ma  
Zhonghua Ma  
Margaret MacDonald  
Michael Mach  
Fabiana Machado  
Carolyn Machamer  
Matthias Machner  
Jason Mackenzie  
David Mackey  
Erich Mackow  
James MacLachlan  
Annette MacLeod  
Katherine MacNamara  
Hiten Madhani  
Carsten Magnus  
Thien-Fah Mah  
Renaud Mahieux  
Martin Maiden  
Rick Maizels  
Kristiina Makinen  
Shinji Makino  
Natalia Malachowa  
Emilio Malchiodi  
Frank Maldarelli

Ray Malfavon-Borja  
Harmit Malik  
J.S. Malik Peiris  
Richard Malley  
Carolyn Malmstrom  
Julin Maloof  
Francois Malouin  
Ofer Mandelboim  
Micahel Mandell  
Nicolas Manel  
Nicholas Maness  
Balaji Manicassamy  
Shannon Manning  
John Mansfield  
Jean Manson  
Daniel Mansur  
Pierre-Yves Mantel  
Yuxin Mao  
Giulia Marchetti  
Antonio Marcilla  
Joseph Marcotrigiano  
David Margolis  
David Margulies  
G. Maria Hansch  
Brian Mark  
R. Mark Buller  
Melanie Marketon  
Thomas Marlovits  
Ernesto Marques  
Carl Marrs  
Mark Marsh  
Eric Martens  
Matthias Marti  
Coralie Martin  
Gregory Martin  
Malcolm Martin  
Richard Martin  
Stephen Martin  
Elena Martinelli  
Juan Martinez  
Encarnacion Martinez-Salas  
Luis Martínez-Sobrido  
Juan Martin-Serrano  
John Mascola  
Pietro Mastroeni  
Maria Masucci  
Candace Mathiason  
Cyrille Mathieu  
Frederick Matsen  
Masao Matsuoka  
Joseph Mattapallil

Bonazzi Matteo  
Joerg Mattes  
Keith Matthews  
Qiana Matthews  
Stephen Matthews  
Seema Mattoo  
Kai Matuschewski  
Wendy Maury  
Josef Mautner  
Robin May  
Andreas Mayer  
Katrin Mayer-Barber  
Didier Mazel  
Joseph McArdle  
Alison McBride  
Jere McBride  
Dennis McCance  
Douglas McCarty  
James McCaw  
Mark McClain  
Bruce McClane  
Malcolm McConville  
Craig McCormick  
Jonathan McCullers  
Joseph McCune  
Kathleen McDonough  
John McDowell  
Johnjoe McFadden  
Dorian McGavern  
Michael McHeyzer-Williams  
Gerald McLnerney  
Kevin McIver  
Jane McKeating  
Lyle McKinnon  
Margaret McKinnon  
James McLachlan  
John McLauchlan  
Jason McLellan  
Rima McLeod  
Rachel McLoughlin  
Aoife McLysaght  
Don McManus  
Andrew McMichael  
Rachel McMullan  
Eileen McNeill  
Henry McSorley  
Stephen McSorley  
Michael McVoy  
Joan Meccas  
Jean-Louis Mege  
Bornha Mehrad

Annemarie Meijer  
Graeme Meintjes  
Marina Meixner  
John Mekalanos  
Peter Melby  
Thomas Melendy  
Jose Melero  
Gregory Melikyan  
J. L. Mellies  
Cicero Mello  
Cécile Ménez  
Gustavo Menezes  
Tesfaye Mengiste  
Joris Menten  
Jason Mercer  
Enrique Mesri  
Martin Messerle  
Dennis Metzger  
Edward Miao  
Jun Miao  
Michelle Michalski  
Kristin Michel  
Jan Michiels  
Tam Mignot  
Ivan Mijakovic  
W. Allen Miller  
Cathy Miller  
Christopher Miller  
George Miller  
Samuel Miller  
Virginia Miller  
William Miller  
Kathryn Miller-Jensen  
Kingston Mills  
Booki Min  
Baruch Minke  
Olivo Miotto  
Aaron Mitchell  
Patrick Mitchell  
Thomas Mitchell  
Tim Mitchell  
Makedonka Mitreva  
Masaaki Miyazawa  
Valerie Mizrahi  
Harry Mobley  
Edward Mocariski  
Yorgo Modis  
Jeremy Modridge  
Christopher Mody  
Axel Mogk  
Ian Mohr

Susan Moir  
Denise Monack  
Skorn Mongkolsuk  
Luis Montaner  
Cesare Montecucco  
David Montefiori  
Ronald Montelaro  
Cary Moody  
Hannah Moore  
Julie Moore  
Martin Moore  
Patrick Moore  
Penny Moore  
Nathaniel Moorman  
Darius Moradpour  
Miguel Morales  
Thomas Moran  
Kevin Morano  
Slivia Moreno  
Christopher Mores  
Sarah Morgan  
Koki Morizono  
Renato Morona  
Jack Morris  
Richard Morris  
Liam Morrison  
Thomas Morrison  
Joachim Morschhäuser  
Stephen Morse  
Nathan Mortimer  
George Mosialos  
Bernard Moss  
David Mosser  
Karen Mossman  
Serge Mostowy  
Walther Mothes  
Jeremy Mottram  
Zhirong Mou  
Andrew Moulard  
Adrian Mountford  
Hugo Mouquet  
Benoit Moury  
Laurence Mouton  
Anne Mueller  
David Mueller  
Ivo Mueller  
Scott Mueller  
Christian Muenz  
Martin Muggerridge  
Shaeri Mukherjee  
Rita Mukhopadhyay

Suchetana Mukhopadhyay  
Viktor Muller  
William Muller  
Marcel Müller  
Mathias Müller  
Viktor Müller  
Matt Mulvey  
Matthew Mulvey  
Ulrike Munderloh  
Joshua Munger  
Carol Munro  
Christian Munz  
Pablo Murcia  
Thomas Murooka  
Eain Murphy  
Peter Murray  
Susan Murray  
Johannes Müthing  
Nick Muzyczka  
Mary Myerscough  
Peter Myler  
Joe Mymryk  
Indira Mysorekar  
Florian Nachon  
Hiroki Nagai  
Mojgan Naghavi  
Shalin Naik  
Meera Nair  
Shigetou Namba  
Franz Narberhaus  
Keiko Naruse  
Michael Nassal  
Sheila Nathan  
William Nauseef  
Hans Nauwynck  
William Navarre  
Lionel Navarro  
Miguel Navarro  
Stuart Neil  
Frank Neipel  
Jay Nelson  
Martha Nelson  
Glen Nemerow  
Mihai Netea  
Karla Neugebauer  
Gabriele Neumann  
Peter Neumann  
Christine Neuveut  
Michael Nevels  
Cedric NEVEU  
Irene Newton

Olivier Neyrolles  
Max Nibert  
John Nicholas  
Tracy Nicholson  
Anthony Nicola  
Annette Niehl  
Christina Nielsen-Leroux  
Stefan Niewiesk  
Dimitar Nikolov  
Falk Nimmerjahn  
Shunbin Ning  
Hiroshi Nishiura  
Suzanne Noble  
Takeshi Noda  
Pauline Nol  
Marina Noris  
Karen Norris  
Steven Norris  
Joshua Nosanchuk  
Mairi Noverr  
Bogdan Nowicki  
Tomoyoshi Nozaki  
Jack Nunberg  
Thorsten Nurnberger  
Thomas Nutman  
Patricia Nuttall  
Joshua Obar  
Marygorret Obonyo  
Meagan O'Brien  
Tom Obrig  
David O'Connor  
Roberta O'Connor  
Eamon O'Dea  
Una O'Doherty  
Anne O'Garra  
Kristen Ogden  
Tomoaki Ogino  
Amanda Oglesby-Sherrouse  
Peter O'Hare  
Päivi Ojala  
Andrew Olive  
Martin Olivier  
Ken Olson  
Michal Olszewski  
Peng Kai Ong  
Akira Ono  
Peter Openshaw  
Fred Opperdoes  
Carlos Orihuela  
Mary O'Riordan  
Amos Orlofsky

David Ornelles  
Kim Orth  
Juan Ortín  
Nir Osherov  
Taku Oshima  
Hiroyuki Oshiumi  
Mike Osta  
Nikolaus Osterrieder  
Helena Ostolaza  
Mario Ostrowski  
Karen Ottemann  
Michael Otto  
Jing-hsiung James Ou  
Marc Ouellette  
Annette Oxenius  
Michelle Ozbun  
Oliver Pabst  
Marie-Hélène Paclet  
Slobodan Paessler  
Antonio Pagán  
Israel Pagán  
Joseph Pagano  
Antony Page  
Rebecca Page  
Emil Pai  
Mirko Paiardini  
Peter Palese  
S Pallikkuth  
Massimo Palmarini  
Ann Palmenberg  
Guy Palmer  
Søren Paludan  
Quintin Pan  
Gianfranco Pancino  
Pushpa Pandiyan  
Yuan-Ping Pang  
Santosh Panjekar  
Ralph Panstruga  
Giuseppe Pantaleo  
Barbara Papadopoulou  
Venizelos Papayannopoulos  
James Papin  
Vijayapalani Paramasivan  
Gregory Pari  
Dane Parker  
Jane Parker  
Michael Parker  
John Parkinson  
Robin Parks  
Colin Parrish  
Marilyn Parsons

Vinay Pathak  
James Paton  
John Patton  
Rick Paul  
W Paul Duprex  
Silke Paust  
Martin Pavelka  
Christopher Peacock  
Edward Pearce  
Joao Pedra  
Mario Pedraza-Reyes  
R. Peebles, Jr.  
Mark Peeples  
Olve Peersen  
Andrew Pekosz  
You-Liang Peng  
Carlos Penha-Goncalves  
Francois Penin  
Marion Pepper  
Markus Perbandt  
Miercio Pereira  
Rushika Perera  
Christian Perez  
John Perfect  
Stanley Perlman  
Robert Perry  
Katarina Persson  
Andreas Peschel  
Everett Pesci  
Brian Peters  
Morten Petersen  
Ellena Peterson  
Constantinos Petrovas  
Julie Pfeiffer  
Jennifer Philips  
Lucia Piacenza  
Andreas Pichlmair  
David Pickup  
Laura Piddock  
Pedro Piedra  
Gerald Pier  
Susan Pierce  
Philippe Pierre  
Ted Pierson  
Joseph Piesman  
Thomas Pietschmann  
Vincent Piguët  
Satish Pillai  
Zachary Pincus  
Richard Pine  
Jaume Pinol

David Pintel  
James Pipas  
Bodo Plachter  
Vicente Planelles  
Gregory Plano  
Richard Plemper  
Hidde Ploegh  
Alexander Ploss  
Christopher Plowe  
Eric Poeschla  
Stefan Pohlmann  
Guido Poli  
Sergei Kosakovsky Pond  
Miquel Pons  
Mikhail Pooggin  
Leo Poon  
Michel Popoff  
Steven Porcelli  
Daniel Portnoy  
Jan Potempa  
Wayne Potts  
Michael Povelones  
Gianni Pozzi  
Gabriele Pradel  
Reinhild Prange  
Bidadi Prasad  
Peter Prevelige  
Lance Price  
Alice Prince  
Immo Prinz  
Suzette Priola  
Richard Proctor  
David Proud  
Patrick Provost  
Jude Przyborski  
Anne Puel  
Jose Puente  
Nathalie Pujol  
Bali Pulendran  
Mirja Puolakkainen  
Georgiana Purdy  
Lei Qi  
Jin-Long Qiu  
Feng Qu  
Lee Quinton  
Nancy Raab-Traub  
Vincent Racaniello  
Justin Radolf  
Magdalena Radwanska  
Manuela Raffatellu  
Malini Raghavan

Laurence Rahme  
Glenn Rall  
Katherine Ralston  
Paul Ramsland  
Glenn Randall  
Richard Randall  
Troy Randall  
Felix Randow  
A.L.N. Rao  
Rama Rao Amara  
Didier Raoult  
Chad Rappleye  
Jason Rasgon  
David Rasko  
Poonam Rath  
Phil Rather  
Adam Ratner  
Lee Ratner  
Stefan Raunser  
William Rawlinson  
Ranjit Ray  
Ratna Ray  
Stuart Ray  
Julian Rayner  
Laurie K Read  
Sullivan Read  
Patrick Reading  
Walt Ream  
Mathias Reddehase  
Alec Redwood  
Sarah Reece  
Douglas Reed  
Michael Reed  
Sharon Reed  
Michael Reese  
R. Keith Reeves  
Fulvio Reggiori  
Roland Regoes  
Barbara Rehermann  
Nancy Reich  
Jonathan Reichner  
Alan Rein  
Neil Reiner  
Celso Reis  
Russel Reiter  
David Rekosh  
David Relman  
Edmond Remarque  
Han Remaut  
Jyothi Rengarajan  
Laurent Rénia

Rolf Renne  
Natalia Requena  
Félix Rey  
Hugh Reyburn  
Matthew Reynolds  
Stuart Reynolds  
Todd Reynolds  
Kyu Rhee  
Carlo Riccardi  
Andrew Rice  
Stephen Rice  
Anthony Richardson  
Douglas Richman  
Sara Richter  
Alan Rickinson  
Michelle Riehle  
Angelika Riemer  
Jan Riemer  
Arne Rietsch  
Eleanor Riley  
James Riley  
Steven Riley  
Guus Rimmelzwaan  
Meritxell Riquelme  
Jean Ristaino  
Beatrice Riteau  
Christophe Ritzenthaler  
Susana Rivas  
Amariliz Rivera  
Frazer Rixon  
Silke Robatzek  
Carlos Robello  
David Roberts  
Richard Roberts  
Erle Robertson  
Rosemary Rochford  
Daniel Rockey  
Barry Rockx  
Richard Roden  
Isabel Roditi  
Nuri Rodriguez  
Maria Rodríguez  
John Roehrig  
David Rogers  
Stephen Rogerson  
John Rohde  
George Rohrmann  
Antonis Rokas  
Richard Roller  
Jeffrey Rollins  
Chiara Romagnani

Ann Roman  
Ute Römling  
Keshet Ronen  
Lijun Rong  
Roy Roop II  
Marilyn Roossinck  
Carlos Ros  
Patricia Rosa  
Adriana Rosato  
Jason Rosch  
Susan Rosenberg  
Ilan Rosenshine  
Philip Rosenthal  
Susan Ross  
Michael Rossmann  
Simon Rothenfusser  
Carla Rothlin  
Brice Rotureau  
June Round  
Barry Rouse  
Thierry Rouxel  
Aileen Rowan  
Alex Rowe  
Martin Rowe  
Sarah Rowland-Jones  
David Rowlands  
Chad Roy  
Craig Roy  
Syamal Roy  
Peter Rubenstein  
Harvey Rubin  
Daniel Rubio  
Gloria Rudenko  
Kendra Rumbaugh  
Andreas Rummel  
Jan Rupp  
Steffen Rupp  
Laura Rusche  
Bruce Russell  
Charles Russell  
Colin Russell  
David Russell  
H. Ruth Ashbee  
Julian Rutherford  
Zsolt Ruzsics  
Brent Ryckman  
Bernhard Ryffel  
Wang-Shick Ryu  
Suraj Sable  
Jonah Sacha  
George Sachs

Ivan Sadowski  
Jeroen Saeij  
Xavier Saelens  
Asier Sáez-Ciri3n  
Saveez Saffarian  
David Safronetz  
Manish Sagar  
Helen Saibil  
Linda Saif  
Takeshi Saito  
Uma Sajjan  
Juan Salazar  
Shahram Salek-Ardakani  
Marco Salemi  
Padmini Salgame  
Maxim Salganik  
Nita Salzman  
Clare Sample  
Jeffery Sample  
Charles Samuel  
James Samuel  
Rogier Sanders  
Rozanne Sandri-Goldin  
H3l3ne Sanfa3on  
Rafael Sanjuan  
Andrea Sant  
Mario Santiago  
Kaustuv Sanyal  
Erica Sapphire  
Martin Sapp  
Saumendra Sarkar  
Peter Sarnow  
Christopher Sassetti  
Zsuzsanna Sasvari  
Karla Satchell  
Noah Sather  
Sachiko Sato  
Yorifumi Satou  
Quentin Sattentau  
John-Demian Sauer  
Karin Sauer  
Robert Sauerwein  
Charles Saunders  
Dorothea Sawicki  
Charles Scanga  
Vincenzo Scarlato  
Joseph Schacherer  
Brian Schaffhausen  
Luis Schang  
Julio Scharfstein  
Hermann Sch3tzl

Mario Schelhaas  
Mark Schembri  
Cara-Lynne Schengrund  
Sergio Schenkman  
Dieter Schifferli  
Adam Schikora  
Stefan Schild  
Martin Schlee  
Mark Schleiss  
Todd Schlenke  
Larry Schlesinger  
Patrick Schloss  
Kimberly Schluns  
Connie Schmaljohn  
Sandra Schmid  
Gudula Schmidt  
M. Schmidt  
Nathan Schmidt  
Sarah Schmidt  
Anthony Schmitt  
Gerold Schmitt-Ulms  
Mirco Schmolke  
Michael Schmueck  
Dirk Schnappinger  
Achim Schnauffer  
Anette Schneemann  
Olaf Schneewind  
Andre Schneider  
David Schneider  
Matthias Schnell  
John Schoggins  
Herman Scholthof  
Christoph Sch3n  
Jeffrey Schorey  
Tony Schountz  
Anthony Schryvers  
Soeren Schubert  
Christoph Schuller  
Stephanie Sch3ller  
Stacey Schultz-Cherry  
Thomas Schulz  
Erwin Schurr  
Robert Schuurink  
William Schwan  
Ira Schwartz  
Olivier Schwartz  
Evelin Schwarzer  
Martin Schwemmle  
Kristin Scott  
Phillip Scott  
Rona Scott

Thomas Scott  
D. Scott Merrell  
Gavin Screaton  
Eileen Scully  
Matthew Seaman  
Michael Seaman  
Nabila Seddiki  
Robert Seder  
Jessica Seeliger  
Brahm Segal  
Gil Segal  
Stephan Seiler  
Ulrike Seitzer  
Rafick-Pierre Sekaly  
Liisa Selin  
Barbara Selisko  
Timothy Sellati  
Bert Semler  
Oliver Semmes  
Adrish Sen  
Ganes Sen  
Laura Serbus  
Irina Sereti  
Lena Serghides  
Janakiram Seshu  
Peter Setlow  
Alessandro Sette  
Stephanie Seveau  
David Severson  
Karl Seydel  
William Shafer  
Yechiel Shai  
Libo Shan  
Feng Shao  
Michael Shapira  
Michal Shapira  
Amit Sharma  
Cynthia Sharma  
Pushkar Sharma  
Neelam Sharma-Walia  
Lindsey Shaw  
Megan Shaw  
Pang-Chui Shaw  
Dmitry Shayakhmetov  
Lilach Sheiner  
Aimee Shen  
Li Shen  
Qian-Hua Shen  
Don Sheppard  
Alan Sher  
Philip Sherman

Ethan Shevach  
Meiqing Shi  
Pei-Yong Shi  
Y. Shi  
Naoto Shibuya  
Chiaho Shih  
Shin-Ru Shih  
Michael Shiloh  
Hiroyuki Shimizu  
Toshiyuki Shimizu  
Haina Shin  
Sunny Shin  
Joanna Shisler  
Pranav Shivakumar  
Charles Shoemaker  
Naglaa Shoukry  
Joshua Shrout  
Deepak Shukla  
Carol Hopkins Sibley  
Shahid Siddique  
Aleem Siddiqui  
Inga Siden-Kiamos  
Luis Sigal  
Christina Sigurdson  
Anita Sil  
Robert Siliciano  
Neal Silverman  
Olivier Silvie  
Valerie Sim  
Cauchemez Simon  
Scott Simon  
Viviana Simon  
Carmen Simón-Mateo  
Alison Sinclair  
John Sinclair  
Neena Singh  
Photini Sinnis  
Eric Skaar  
Rebecca Skalsky  
Robert Skov  
Jacek Skowronski  
Betty Slagle  
Mariel Slater  
Barton Slatko  
Mark Slifka  
Pamela Small  
Mark Smeltzer  
James Smiley  
Jolanda Smit  
Duncan Smith  
Everett Smith

Geoffrey Smith  
Janet Smith  
Joe Smith  
Judith Smith  
Terry Smith  
Thomas Smithgall  
Eric Snijder  
Georges Snounou  
Christopher Snyder  
Magdalene So  
Miguel Che Soares  
Milena Soares  
Peter Soboslay  
Beate Sodeik  
Kenneth Söderhäll  
Maria Söderlund-Venermo  
Kee hoon Sohn  
Evgeni Sokurenko  
Samantha Soldan  
Peter Solomon  
Greg Somerville  
Gregory Sonnenberg  
Justin Sonnenburg  
Joseph Sorg  
Tania Sorrell  
Claudio Soto  
Gerald Spaeth  
Stefania Spanò  
Tim Sparer  
Paul Spearman  
Sabine Specht  
Deborah Spector  
Stephen Spector  
Brad Spellberg  
Vanessa Sperandio  
Christina Spiropoulou  
Hergen Spits  
Serena Spudich  
Shiranee Sriskandan  
Ashley St John  
E. V. Stabb  
Colin Stack  
Peter Staeheli  
Christopher Staiger  
Henry Staines  
Jason Stajich  
Christina Stallings  
Leonidas Stamatatos  
Thomas Stamminger  
Sarah Stanley  
Vincent Starai

Brian Staskawicz  
Michael Stassen  
Bärbel Stecher  
John Steel  
Chad Steele  
Olivia Steele-Mortimer  
Thilo Stehle  
Alexander Steinle  
Torsten Steinmetzer  
Steffen Stenger  
Grant Stentiford  
Robin Stephens  
Ioannis Stergiopoulos  
Lawrence Stern  
Jeremy Sternberg  
Paul Sternberg  
Alasdair Steven  
Mary Stevenson  
Philip Stevenson  
James Stewart  
Adrie Steyn  
Scott Stibitz  
Benoit Stijlemans  
Monique Stins  
Mark Stinski  
Patricia Stock  
Paul Stoodley  
Henrik Stotz  
Jose Stoute  
Jonathan Stoye  
Michael Strand  
Klaus Strebel  
Hendrik Streeck  
Daniel Streicker  
Adrian Streit  
Roland Strong  
Richard Strugnell  
Natalie Strynadka  
Lynda Stuart  
Gerald Stubbs  
David Studholme  
Jason Stumhofer  
Chunlei Su  
Xin-zhuan Su  
Carlos Subauste  
Kanta Subbarao  
Sriram Subramaniam  
Peter Sudbery  
Christine Suetterlin  
Bill Sugden  
Christopher Sullivan

William Sullivan  
Paul Sumbly  
Joseph Sun  
Peter Sun  
Ren Sun  
Wenxian Sun  
Shao-Cong Sun  
Surachai Supattapone  
Camille Sureau  
Michael Surette  
Witold K Surewicz  
Mehul Suthar  
Gerd Sutter  
Fayyaz Sutterwala  
Tetsuro Suzuki  
Catharina Svanborg  
Sankar Swaminathan  
Michele Swanson  
Michelle Swanson-Mungerson  
Ronald Swanstrom  
Gulam Syed  
Yuri Sykulev  
Michael Szostak  
Makoto Takeda  
Toru Takimoto  
Frank Takken  
Kawsar Talaat  
Karel Talavera  
Nicholas Talbot  
Yunhao Tan  
Hengli Tang  
Wei-jen Tang  
Herbert Tanowitz  
Caroline Tapparel  
Vera Tarakanova  
Isabelle Tardieux  
Rick Tarleton  
David Tarp  
Ann Tate  
Jeffery Taubenberger  
Norbert Tautz  
Jesse Taylor  
John Taylor  
Terrie Taylor  
John Teijaro  
Luis Teixeira  
Alice Telesnitsky  
Glenn Telling  
Timothy Tellinghuisen  
Lesly Temesvari  
Italo Tempera

Benjamin tenOever  
Ryohei Terauchi  
Cox Terhorst  
Scott Terhune  
Vernon Tesh  
Ken Teter  
Guillaume Tetreau  
Hervé Tettelin  
Rita Tewari  
Markus Thali  
David Thanassi  
Vaskar Thapa  
Ulrich Theopold  
Volker Thiel  
Dennis Thiele  
Robert Thimme  
Paul Thomas  
Bart Thomma  
Hans Thordal-Christensen  
David Thorley-Lawson  
Stephen Thorne  
Justin Thornton  
Scott Tibbetts  
Leann Tilley  
Jens Tilsner  
Rabindra Tirouvanziam  
Peter Tobias  
Niraj Tolia  
Ana Tomás  
Massimo Tommasino  
Jan Tommassen  
Keizo Tomonaga  
Dan Tompkins  
Stephen Tompkins  
Qiong Tong  
Tone Tonjum  
Christopher Tonkin  
Jordi Torrelles  
Victor Torres  
Domenico Tortorella  
Zsolt Toth  
Lhousseine Touqui  
Paula Trakman  
Paula Traktman  
Ana Traven  
Katharine Trenholme  
Patrick Trieu-Cuot  
Steven Triezenberg  
Mirko Trilling  
Ralph Tripp  
Emily Troemel

Billy Tsai  
Ching-Hsiu Tsai  
Harley Tse  
Renée M. Tsolis  
Mizushima Tsunehiro  
Bettina Tudzynski  
Cagla Tukul  
Nilgun Tumer  
Terrence Tumpsey  
Elaine Tuomanen  
B. Turgeon  
Ted Turlings  
Joseph Turner  
Paul Turner  
Stephen Turner  
Rodney Tweten  
Brett Tyler  
Sukathida Ubol  
Irina Udalova  
Takashi Ueda  
Glen Ulett  
Buddy Ullman  
Elisabetta Ullu  
David Underhill  
Leonie Unterholzner  
Derya Unutmaz  
Susan Uprichard  
Jason Upton  
Constantin Urban  
Michael Urbaniak  
Kevin Urdahl  
Edward Usherwood  
Mart Ustav  
Jude Uzonna  
Lisa Vaillancourt  
Oswaldo Valdes-Lopez  
Pedro Vale  
Barbara Valent  
Michael Valentino  
Richard Vallee  
Debbie van Baarle  
Frank van de Veerdonk  
Jan Van Den Abbeele  
Guido Van den Ackerveken  
Sjoerd van der Burg  
Luc van der Laan  
Tom van der Poll  
Ando van der Velden  
Nicole van der Wel  
Jan Maarten van Dijk  
Giel van Dooren

Linda van Dyk  
Thomas Van Dyke  
Peter van Endert  
Peter van Esse  
Luc Van Kaer  
Jan van Kan  
Lucien van Keulen  
Frank van Kuppeveld  
René van Lier  
Rene van Lier  
Carine Van Lint  
Ronald van Rij  
Jos van Strijp  
Wesley Van Voorhis  
Ger van Zandbergen  
Russell Vance  
Scott Vande Pol  
Dennis vanEngelsdorp  
Ramakrishna Vankayalapati  
Steven Varga  
Michael Vasil  
Jiri Vavra  
Andres Vazquez-Torres  
Ronald Veazey  
Jan-Willem Veening  
Andre Veillette  
Vittorio Venturi  
Jeanmarie Verchot-Lubicz  
Bruno Verhasselt  
Subhash Verma  
David Vermijlen  
Gijs Versteeg  
Viiva Vezys  
Muriel Viaud  
Cecile Viboud  
Silvia Vidal  
Ana Vigario  
Marco Vignuzzi  
Francois Villinger  
Andreas Villunger  
Boris Vinatzer  
Amy Vincent  
Mark Viney  
Donald Vinh  
Karen Visick  
Jörg Vogel  
Loy Volkman  
Waldemar Vollmer  
Thomas von Hahn  
Andreas von Tiedemann  
Frank Voncken

Christoph Vorburger  
Frank-Jörg Vorhölter  
M. Vos  
Leslie Vosshall  
Daniel Voth  
Jovanka Voyich-Kane  
Jatin Vyas  
Alan W Decho  
Simon Waddell  
Joseph Wade  
Stephen Waggoner  
Matthew Waldor  
Christopher M. Walker  
David Walker  
Graham Walker  
Lary Walker  
Suzanne Walker  
Jacco Wallinga  
Sarah Walmsley  
Thierry Walzer  
Gerhard Walzl  
Cecile Wandersman  
Jack Wands  
Aiming Wang  
Eddie Wang  
Fu-Sheng Wang  
Ming-Bo Wang  
Robert Wang  
Xiaofeng Wang  
Xiaohong Wang  
Zonghua Wang  
Kasper Wang  
E. Sally Ward  
Gary Ward  
Honorine Ward  
Matthew Wargo  
Digby Warner  
Karen Wassarman  
Andrew Waters  
David Watkins  
Paula Watnick  
David Waugh  
Michael Way  
Friedemann Weber  
Taiyun Wei  
Christopher Weidenmaier  
J. Brice Weinberg  
Janis Weis  
John Weis  
Jeffrey Weiser  
Brian Weiss

David Weiss  
Louis Weiss  
Robin Weiss  
Susan Weiss  
Winfried Weissenhorn  
James Weisshaar  
Matthew Weitzman  
Matthew Welch  
Sandra Weller  
Dave Wemmer  
Annemarie Wensing  
David Wentworth  
Joel Wertheim  
Catherine Werts  
Gail Wertz  
Michael Wessels  
Michelle West  
Robert Wheeler  
Sean Whelan  
Stephen Whisson  
Denise Whitby  
Judith White  
K. Andrew White  
Michael White  
Adrian Whitehouse  
Marvin Whiteley  
Malcolm Whiteway  
Anna Whitfield  
Steven Whitham  
Jason Whitmire  
Gary Whittaker  
Ian Wickersham  
Reed Wickner  
Matthew Wiebe  
Ursula Wiedermann  
Mark Wiener  
Emmanuel Wiertz  
Chris Wiethoff  
Brian Wigdahl  
Stephen Wikel  
Clayton Wiley  
Gavin Wilkinson  
Angela Wilks  
Holger Wille  
Lucas Willems  
Sven Willger  
Bryan Williams  
David Williams  
Kenneth Williams  
Matthew Williams  
Peter Williamson

Mark Wills  
Angus Wilson  
Joyce Wilson  
Mark Wilson  
Patrick Wilson  
Paul Wingfield  
Malcolm Winkler  
Gary Winslow  
Sebastian Winter  
Roger Wise  
Elizabeth Wohlfert  
James Wohlschlegel  
Thorsten Wolff  
Matthew Wolfgang  
Adrian Wolstenholme  
Christiane Wolz  
Elizabeth Wonderlich  
Wilson Wong  
Charles Wood  
Craig Woodworth  
Linda Wooldridge  
Stefan Worgall  
Floyd Wormley, Jr.  
Daniel Wozniak  
Jens Wrammert  
David Wright  
Gerard Wright  
Jianguo Wu  
Joseph Wu  
Li Wu  
Louisa Wu  
Min Wu  
Ting-ting Wu  
Martin Wubben  
Richard Wyatt  
Michelle Wykes  
David Wyles  
Thomas Wynn  
Mariana Xavier  
Jun Xia  
Yan Xiang  
Gutian Xiao  
Zhou Xing  
Jin-Rong Xu  
Chaoyang Xue  
Hai-Hui Xue  
Timothy Yahr  
Masahiro Yamamoto  
Yoshio Yamaoka  
Takeshi Yamasaki  
Masahiro Yamashita

Yohei Yamauchi  
Seiya Yamayoshi  
Yusuke Yanagi  
Otto Yang  
Soo-Jin Yang  
George Yap  
Neil Yarlett  
Felix Yarovinsky  
Andrew Yates  
Maria Yazdanbakhsh  
Ellen Yeh  
Jonathan Yewdell  
MinKyung Yi  
Michael Yin  
Dongwan Yoo  
Hiroki Yoshida  
Tamotsu Yoshimori  
Dahui You  
Carolyn Young  
Howard Young  
Kevin Young  
Paul Young  
Benjamin Youngblood  
Je-Wook Yu  
Xiao-Fang Yu  
Peihua Yuan  
Weiming Yuan  
Yan Yuan  
Andrew Yurochko  
Jose Yuste  
Bourne Yves  
Eliora Z Ron  
Mark Zabel  
Olga Zaborina  
Allan Zajac  
Dirk Zajonc  
Xingxing Zang  
Agustín Zapata  
Michael Zasloff  
Fidel Zavala  
Teresa Zelante  
Kornelius Zeth  
Jian Zhang  
Li Zhang  
Shuqun Zhang  
Xuming Zhang  
Zhang Zhang  
Zhi-Ming Zheng  
Guangming Zhong  
Bin Zhou  
Daoguo Zhou

Hong Zhou  
Jian-Min Zhou  
Fanxiu Zhu  
Jun Zhu  
Yongqun Zhu  
John Ziebuhr  
Wilma Ziebuhr  
Joseph Ziegelbauer  
Gert Zimmer  
Richard Zimmermann

Cyril Zipfel  
Simona Zoppi  
Wen-Quan Zou  
Richard Zuerner  
Jian Zuo  
Chiara Zurzolo  
Mark Zwart  
Michael Zwick  
Arturo Zychlinsky
